# Supplementary material for: Signature-Based Small Molecule Screening Identifies Cytosine Arabinoside as an EWS/FLI Modulator in Ewing Sarcoma
Source: PLOS journal article supplement (doi:10.1371/journal.pmed.0040122), 2007-04-04
Supplement: S1 (10.1371/journal.pmed.0040122.s001) [file journal.pmed.0040122.s001]

## Supplementary Figure 1: ARA-C Induces an EWS/FLI *Off* Signature in A673 Ewing Sarcoma Cells

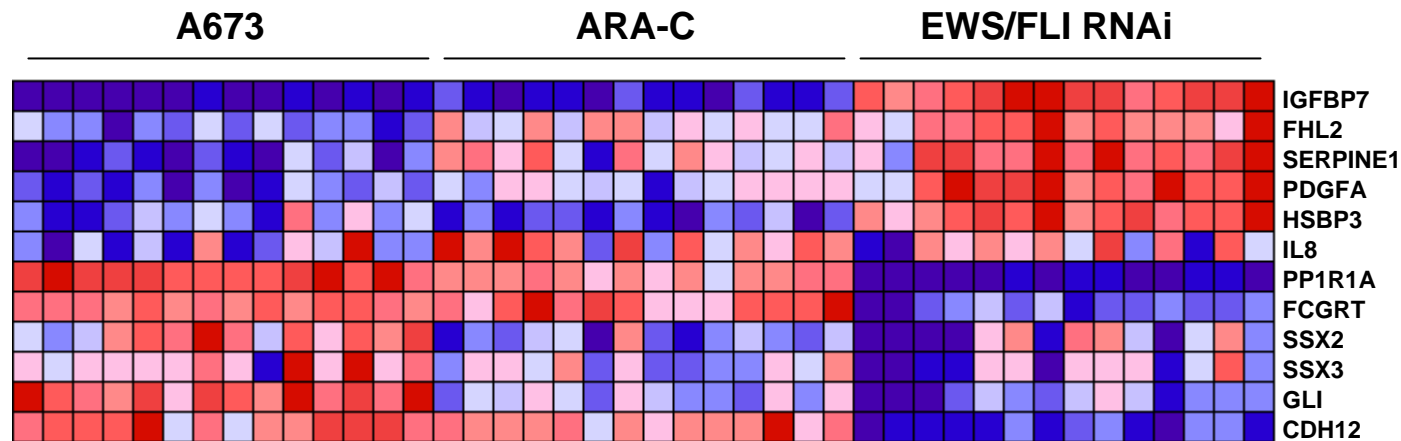

A673 cells were treated in replicate of 14 with vehicle or at the ARA-C EC50 and the EWS/FLI *off* signature genes evaluated with the GE-HTS assay. A673 with EWS/FLI directed shRNA are included as controls. *SCA1* and *SP100* were removed from the analysis secondary to poor performance in the controls. ARA-C treatment induced the appropriate direction of change in the majority of marker genes consistent with EWS/FLI *off*. Samples are shown in columns and genes in rows as a ratio to the control gene, *GAPD*. Blue represents poorly expressed genes and red depicts highly expressed genes with row normalization.
